Development 133, 181 doi:10.1242/dev.02227

## Gata4 regulates the formation of multiple organs

**Audrey Holtzinger and Todd Evans** *Development* **132**, 4005-4014.

This article contains two errors that have come to light after recent updates to the Zebrafish Information Network and the Ensemble databases.

The sequence of the translation blocker morpholino MO detailed on p. 4006 is 5'-TCCACAGG...-3' and MO1 actually targets the intron 2/exon 3 boundary of the *gata4* pre-mRNA, although this does not affect its function.

The authors apologise to readers for these mistakes.
